# Supplementary material for: Digital profiling of gene expression from histology images with linearized attention
Source: PubMed Central journal article supplement — Nat Commun. 2024 Nov 14;15:9886. doi: 10.1038/s41467-024-54182-5 (PMC11564640; doi:10.1038/s41467-024-54182-5), 2024-11-14
Supplement: 41467_2024_54182_MOESM3_ESM.pdf [file 41467_2024_54182_MOESM3_ESM.pdf]

**Description of Additional supplementary files**

**Supplementary Data 1:** Biological process associated with the well-predicted genes

**Supplementary Data 2:** Molecular pathways associated with the well-predicted genes

**Supplementary Data 3:** Cell-type signatures from the well-predicted genes

**Supplementary Data 4:** Prognostic signatures with well-predicted expression values in breast cancer

**Supplementary Data 5:** Gene names and hazard ratios of the prognostic signature
